# Supplementary material
Source: PubMed Central journal article supplement (PMC4875842)
Supplement: NIHMS774416-supplement-1.pdf [file NIHMS774416-supplement-1.pdf]

## Supplementary Figure 1

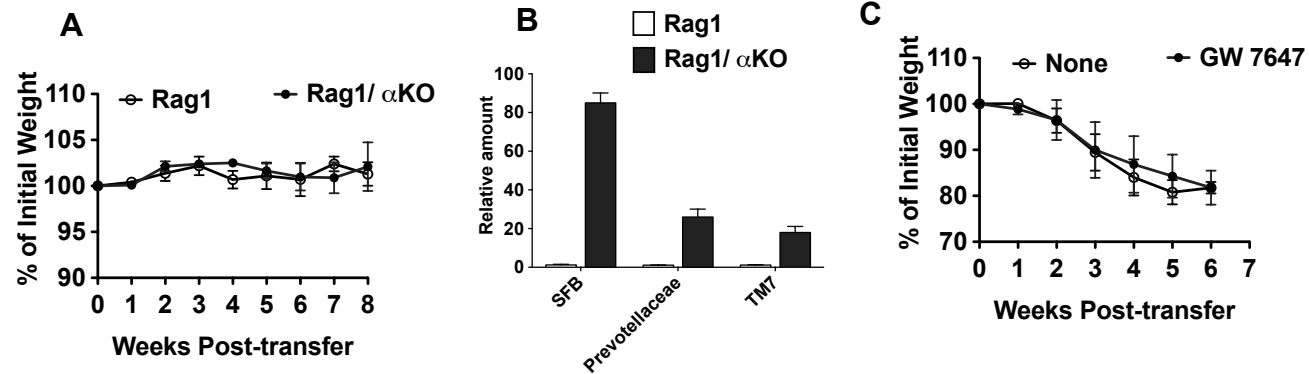

**Supplementary Figure 1.** Intestinal inflammation in Rag1KO and Rag1/αKO mice. **(A)** Percent weight change compared to initial weight for Rag1KO and Rag1/αKO mice at indicated time points post CD4<sup>+</sup>CD25<sup>-</sup>CD45RB<sup>hi</sup> T cells plus CD4<sup>+</sup>CD25<sup>+</sup> T cells adoptive transfer (n=5); **(B)** Relative quantification of different bacterial species in the fecal material from Rag1/αKO mice compared with Rag1 mice as analyzed by quantitative RT-PCR analysis (n= 5). **(C)** Percent weight change compared to initial weight for Rag1/αKO mice at indicated time points post CD4<sup>+</sup>CD25<sup>-</sup>CD45RB<sup>hi</sup> T cells and treated with or without PPARα agonist orally (GW7647; 10mg/kg) (n=5).
